# Supplementary material for: Exploring Genetic Divergence in a Species-Rich Insect Genus Using 2790 DNA Barcodes
Source: PubMed Central journal article supplement (PMC4583400; doi:10.1371/journal.pone.0138993), 2015-09-25

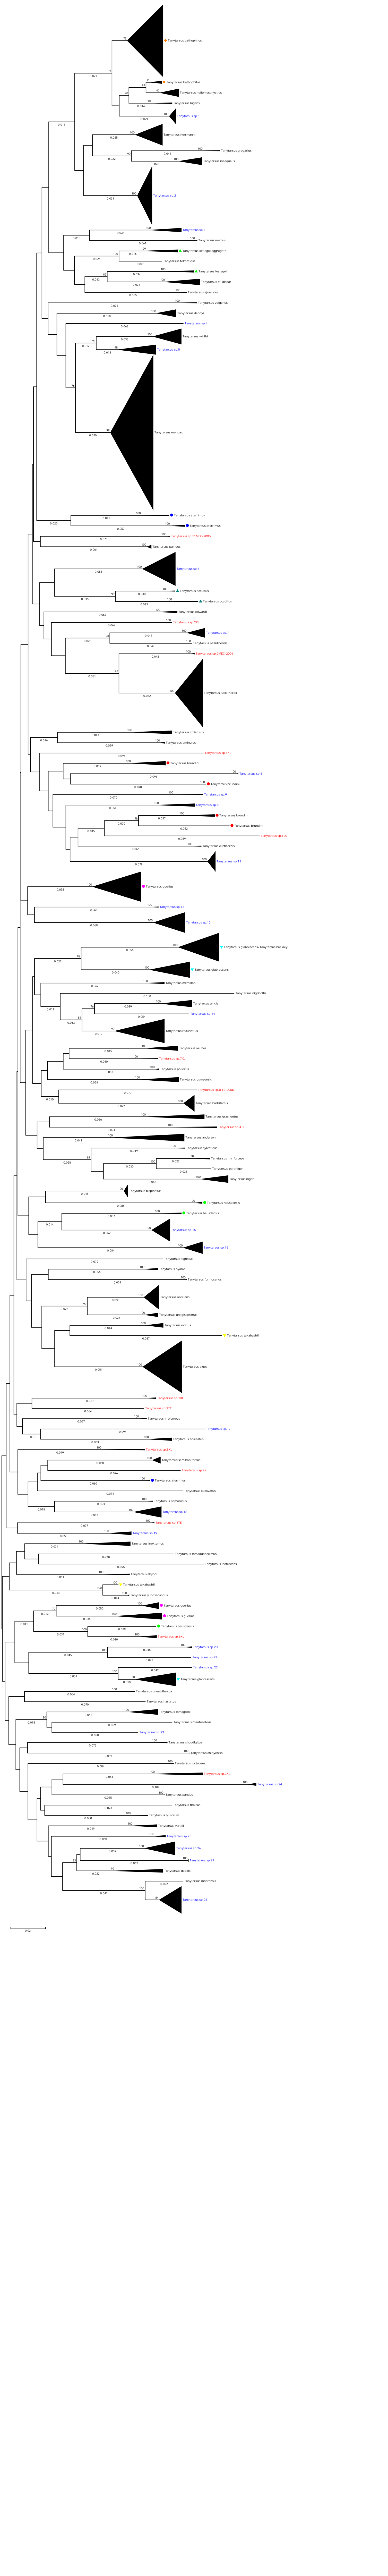

Supplement: pone.0138993.s001.pdf [file pone.0138993.s001.pdf]
